# Supplementary material for: Household disinfection practices by women living in Egypt during the 2020 COVID-19 lockdown and the association of information sources and suspected bleach toxicity
Source: Springer Nature journal article supplement (doi:10.1186/s12889-022-14570-2), 2022-11-18
Supplement: MOESM1 [file 23730622]

454 responses

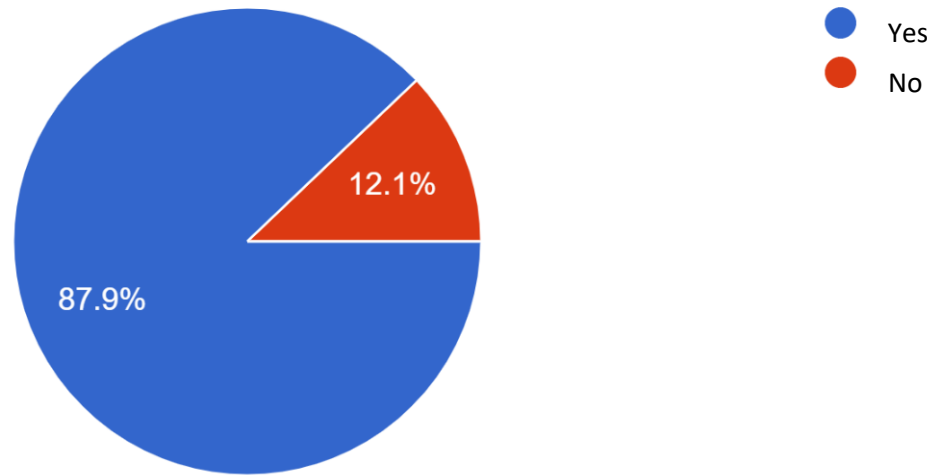

Supp. Fig 1: The disinfectants used by participants since the beginning of the lockdown.

(Soap: 262 (65.7 %), Dettol: 120 (30.1 %), Lysol: 8 (2 %), Bleach: 360 (90.2 %), Alcohol: 298 (74.7 %), Others: 22 (5.5 %)).

N.B. results are not mutually exclusive.

366 responses

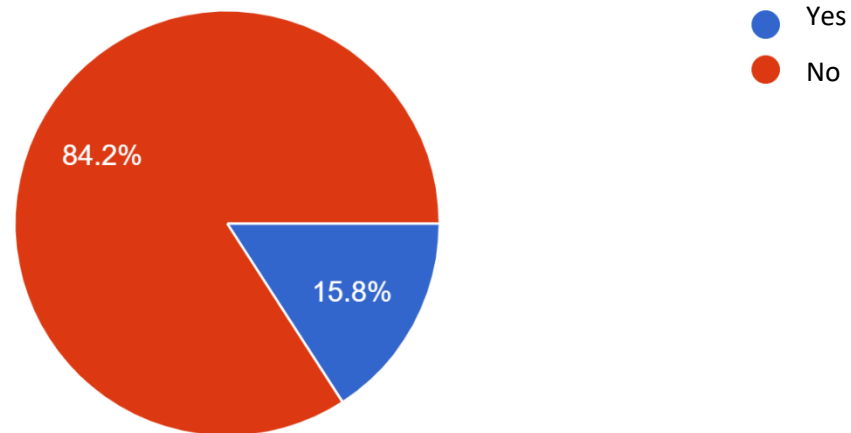

Supp. Fig 2: The responses to the question: if you used bleach for disinfection during the lockdown, did you mix with any other substances?  
Answers: No 308 (84.2%), Yes 58 (15.8%).

The number of the responses (366) is less than the total number of responses of the survey (454) as this question appears only to participants responded with “yes” to a previous question asking about increased use of disinfectants since the beginning of the lockdown (see questionnaire questions attached).

366 responses

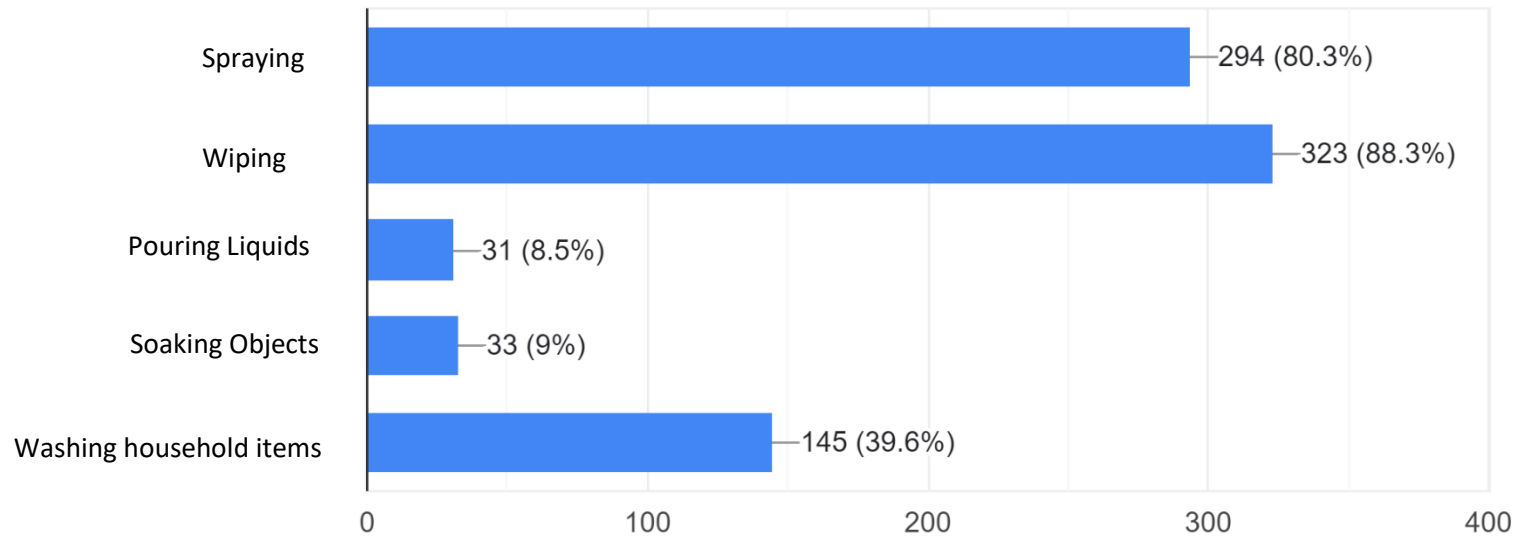

Supp. Fig 3: The responses to the question: How did you use the cleaning products and disinfectants in your household during the lockdown? You can choose all what applies for you? Answers: Spraying 294 (80.3%), Wiping 323 (88.3%), Pouring liquids 31 (8.5%), Soaking objects 33 (9%), Washing household objects 145 (36.6%).

N.B. results are not mutually exclusive. The number of the responses (366) is less than the total number of responses of the survey (454) as this question appears only to participants responded with “yes” to a previous question asking about increased use of disinfectants since the beginning of the lockdown (see questionnaire attached).

366 responses

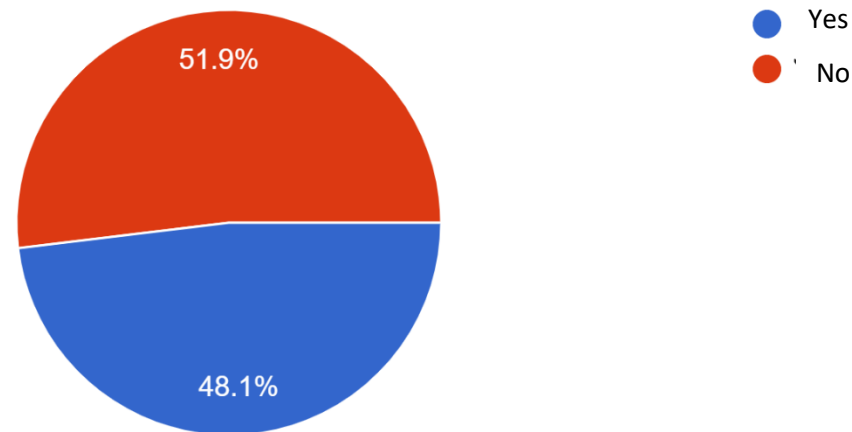

Supp. Fig 4: The responses to the question: Did you use any personal protective equipment for these chemical products while disinfecting your household during the lockdown for Corona virus? Answers: No 190 (51.9%), Yes 176 (48.1%).

The number of the responses (366) is less than the total number of responses of the survey (454) as this question appears only to participants responded with “yes” to a previous question asking about increased use of disinfectants since the beginning of the lock down (see questionnaire questions attached).



| Category                                  | Highest degree |         |
|-------------------------------------------|----------------|---------|
|                                           | No.            | (%)     |
| 1: Secondary Degree (High school) or less | 1              | (4.4)   |
| 2: University (College) Degree            | 2              | (67.7)  |
| 3: Master's (Level) Degree                | 3              | (14.6)  |
| 4: Doctoral (Level) Degree                | 4              | (13.3)  |
| Total                                     | 452            | (100.0) |

Supp. Table 1 : The answer to the question: What is the socioeconomic status (i.e., highest level of education) of the person who filled in the survey?

| Age Group      | No  | %       |
|----------------|-----|---------|
| 18-25 yrs      | 24  | (5.3)   |
| 26-45 yrs      | 351 | (77.3)  |
| 46-59 yrs      | 66  | (14.5)  |
| 60 or more yrs | 11  | (2.4)   |
| Total          | 452 | (100.0) |

Supp. Table 2 : The answer to the question: What is the age group of the person who filled in the survey?

|                    | Geographic location |         |
|--------------------|---------------------|---------|
|                    | No.                 | (%)     |
| 0: ***             | 23                  | (5.1)   |
| 1: Cairo           | 304                 | (67.3)  |
| 2: Giza            | 40                  | (8.9)   |
| 3: Alexandria      | 3                   | (0.7)   |
| 4: Al-Qalyubia     | 7                   | (1.6)   |
| 5: Al-Monufia      | 7                   | (1.6)   |
| 6: Al-Daqahlia     | 9                   | (2.0)   |
| 8: Al-Sharqia      | 6                   | (1.3)   |
| 10: Damietta       | 4                   | (0.9)   |
| 11: Kafr Al-Sheikh | 2                   | (0.4)   |
| 18: Al-Menia       | 2                   | (0.4)   |
| 19: Assiut         | 32                  | (7.1)   |
| 20: Sohag          | 8                   | (1.8)   |
| 21: Qena           | 1                   | (0.2)   |
| 22: Luxor          | 1                   | (0.2)   |
| 23: Aswan          | 2                   | (0.4)   |
| missing            | 1                   | (0.2)   |
| Total              | 452                 | (100.0) |

Supp. Table 3 : The answer to the question: What is the geographic location of the person who filled in the survey?

N.B. This question was the only free answer question in the questionnaire, therefore, the category 0\*\*\* represents the answers that were not clear and did not fit into the categories listed in the table.

| Supplement Data for Figure 2. Information of multiple responses |       |         |                             |       |                        |       |               |       |                             |       |
|-----------------------------------------------------------------|-------|---------|-----------------------------|-------|------------------------|-------|---------------|-------|-----------------------------|-------|
| Any symptom                                                     | Freq. | Percent | Eye                         | Freq. | Skin                   | Freq. | Respiratory   | Freq. | Digestive                   | Freq. |
| 0                                                               | 5     | 1.1     | 1, 2                        | 1     | 1, 2                   | 1     | 0             | 1     | 0                           | 1     |
| 1                                                               | 12    | 2.7     | 1, 2, 3                     | 4     | 1, 2, 3                | 4     | 1, 2, 3       | 11    | 1, 2, 3                     | 2     |
| 1, 2                                                            | 8     | 1.8     | 1, 2, 3, 4                  | 1     | 1, 2, 3, 4             | 3     | 1, 2, 3, 4    | 3     | 1, 2, 3, 4, 5               | 2     |
| 1, 2, 3                                                         | 46    | 10.2    | 1, 2, 3, 4, 5               | 3     | 1, 2, 3, 4, 5          | 5     | 1, 2, 3, 4, 5 | 7     | 1, 2, 3, 5                  | 1     |
| 1, 2, 3, 4                                                      | 35    | 7.7     | 1, 2, 4                     | 1     | 1, 2, 3, 5             | 4     | 1, 2, 3, 5    | 5     | 1, 3, 4                     | 1     |
| 1, 2, 3, 4, 5                                                   | 37    | 8.2     | 1, 3, 4                     | 1     | 1, 2, 4                | 2     | 1, 2, 4       | 1     | 2, 3, 4, 5                  | 2     |
| 1, 2, 3, 5                                                      | 20    | 4.4     | 1, 4                        | 1     | 1, 3, 4                | 2     | 1, 3          | 1     | 3                           | 1     |
| 1, 2, 4                                                         | 17    | 3.8     | 2                           | 1     | 1, 3, 5                | 1     | 1, 3, 4       | 2     | 3, 4, 5                     | 1     |
| 1, 2, 4, 5                                                      | 3     | 0.7     | 2, 3, 4                     | 1     | 1, 4                   | 2     | 1, 3, 4, 5    | 4     | Total                       | 11    |
| 1, 2, 5                                                         | 3     | 0.7     | 2, 3, 4, 5                  | 3     | 2                      | 1     | 1, 3, 5       | 1     |                             |       |
| 1, 3                                                            | 18    | 4.0     | 2, 3, 5                     | 2     | 2, 3                   | 1     | 1, 4          | 3     | Note:                       |       |
| 1, 3, 4                                                         | 33    | 7.3     | 3                           | 1     | 2, 3, 4                | 3     | 1, 5          | 1     | 1 = CDC or WHO website      |       |
| 1, 3, 4, 5                                                      | 21    | 4.7     | 3, 4                        | 1     | 2, 3, 4, 5             | 4     | 2, 3, 4       | 3     | 2 = TV or satellite program |       |
| 1, 3, 5                                                         | 9     | 2.0     | 3, 4, 5                     | 2     | 2, 3, 5                | 3     | 2, 3, 4, 5    | 4     | 3 = Social media            |       |
| 1, 4                                                            | 18    | 4.0     | Total                       | 23    | 3                      | 2     | 2, 3, 5       | 4     | 4 = Physician/pharmacist    |       |
| 1, 4, 5                                                         | 5     | 1.1     |                             |       | 3, 4, 5                | 4     | 3             | 3     | 5 = Relative/friend         |       |
| 1, 5                                                            | 2     | 0.4     | Note:                       |       | 3, 5                   | 1     | 3, 4          | 1     |                             |       |
| 2                                                               | 5     | 1.1     | 1 = CDC or WHO website      |       | Total                  | 43    | 3, 4, 5       | 5     |                             |       |
| 2, 3                                                            | 31    | 6.9     | 2 = TV or satellite program |       |                        |       | 3, 5          | 1     |                             |       |
| 2, 3, 4                                                         | 15    | 3.3     | 3 = Social media            |       | Note:                  |       | Total         | 61    |                             |       |
| 2, 3, 4, 5                                                      | 27    | 6.0     | 4 = Physician/pharmacist    |       | 1 = CDC or WHO website |       |               |       |                             |       |



|                             |     |       |                     |                             |                             |  |  |  |  |
|-----------------------------|-----|-------|---------------------|-----------------------------|-----------------------------|--|--|--|--|
| 2, 3, 5                     | 15  | 3.3   | 5 = Relative/friend | 2 = TV or satellite program | Note:                       |  |  |  |  |
| 2, 4                        | 1   | 0.2   |                     | 3 = Social media            | 1 = CDC or WHO website      |  |  |  |  |
| 2, 4, 5                     | 2   | 0.4   |                     | 4 = Physician/pharmacist    | 2 = TV or satellite program |  |  |  |  |
| 2, 5                        | 1   | 0.2   |                     | 5 = Relative/friend         | 3 = Social media            |  |  |  |  |
| 3                           | 14  | 3.1   |                     |                             | 4 = Physician/pharmacist    |  |  |  |  |
| 3, 4                        | 10  | 2.2   |                     |                             | 5 = Relative/friend         |  |  |  |  |
| 3, 4, 5                     | 18  | 4.0   |                     |                             |                             |  |  |  |  |
| 3, 5                        | 11  | 2.4   |                     |                             |                             |  |  |  |  |
| 4                           | 6   | 1.3   |                     |                             |                             |  |  |  |  |
| 4, 5                        | 4   | 0.9   |                     |                             |                             |  |  |  |  |
| <b>Total</b>                | 452 | 100.0 |                     |                             |                             |  |  |  |  |
| <b>Note:</b>                |     |       |                     |                             |                             |  |  |  |  |
| 1 = CDC or WHO website      |     |       |                     |                             |                             |  |  |  |  |
| 2 = TV or satellite program |     |       |                     |                             |                             |  |  |  |  |
| 3 = Social media            |     |       |                     |                             |                             |  |  |  |  |
| 4 = Physician/pharmacist    |     |       |                     |                             |                             |  |  |  |  |
| 5 = Relative/friend         |     |       |                     |                             |                             |  |  |  |  |

| Supplement Data for Figure 3. Information of multiple responses |         |           |                       |         |           |                |         |           |                     |         |           |                           |         |           |  |
|-----------------------------------------------------------------|---------|-----------|-----------------------|---------|-----------|----------------|---------|-----------|---------------------|---------|-----------|---------------------------|---------|-----------|--|
|                                                                 |         |           |                       |         |           |                |         |           |                     |         |           |                           |         |           |  |
| Any symptom                                                     | Fre q.  | Perc ent  | Eye sympto ms         | Fre q.  | Perc ent  | Skin symptom s | Fre q.  | Perc ent  | Respiratory symptom | Fre q.  | Perc ent  | Digestive symptom         | Fre q.  | Perc ent  |  |
| No symptom                                                      | 38<br>3 | 84.7<br>3 | No sympto m           | 42<br>9 | 94.9<br>1 | No symptom     | 40<br>9 | 90.4<br>9 | No symptom          | 39<br>1 | 84.7<br>3 | No symptom                | 44<br>1 | 84.7<br>3 |  |
| 1, 2                                                            | 1       | 0.22      | 1                     | 4       | 0.88      | 1              | 2       | 0.44      | 1                   | 8       | 1.77      | 1                         | 3       | 0.66      |  |
| 1, 2, 3                                                         | 7       | 1.55      | 1, 3                  | 1       | 0.22      | 1, 2, 3        | 1       | 0.22      | 1, 2                | 4       | 0.88      | 1, 2                      | 1       | 0.22      |  |
| 1, 3                                                            | 6       | 1.33      | 1, 3, 4               | 2       | 0.44      | 1, 2, 3, 4     | 5       | 1.11      | 1, 2, 3             | 2       | 0.44      | 1, 4                      | 1       | 0.22      |  |
| 1, 3, 4                                                         | 1       | 0.22      | 3                     | 13      | 2.88      | 1, 2, 3, 4     | 1       | 0.22      | 1, 2, 3, 4, 5       | 1       | 0.22      | 4                         | 3       | 0.66      |  |
| 2                                                               | 8       | 1.77      | 3, 4                  | 2       | 0.44      | 1, 2, 4        | 2       | 0.44      | 1, 2, 3, 5          | 1       | 0.22      | 5                         | 3       | 0.66      |  |
| 2, 3                                                            | 14      | 3.1       | 4                     | 1       | 0.22      | 1, 3           | 1       | 0.22      | 1, 2, 4, 5          | 2       | 0.44      | Total                     | 45<br>2 | 100       |  |
| 2, 3, 4                                                         | 1       | 0.22      | Total                 | 45<br>2 | 100       | 1, 3, 4        | 1       | 0.22      | 1, 3                | 1       | 0.22      |                           |         |           |  |
| 3                                                               | 31      | 6.86      |                       |         |           | 1, 4           | 5       | 1.11      | 1, 3, 4             | 2       | 0.44      | Note:                     |         |           |  |
| Total                                                           | 45<br>2 | 100       | Note:                 |         |           | 2              | 5       | 1.11      | 1, 3, 4             | 1       | 0.22      | 1 = Hicough               |         |           |  |
|                                                                 |         |           | 1 = Redness           |         |           | 2, 3           | 2       | 0.44      | 1, 4                | 2       | 0.44      | 2 = Vomiting              |         |           |  |
| Note:                                                           |         |           | 2 = Secretio ns       |         |           | 2, 3, 4        | 2       | 0.44      | 1, 4, 5             | 1       | 0.22      | 3 = Difficulty swallowing |         |           |  |
| 1 = Eye                                                         |         |           | 3 = Burning sensation |         |           | 2, 4           | 3       | 0.66      | 1, 5                | 3       | 0.66      | 4 = Burning sensation     |         |           |  |

|                        |  |  |                |  |  |                          |    |      |                                     |    |      |           |  |  |  |
|------------------------|--|--|----------------|--|--|--------------------------|----|------|-------------------------------------|----|------|-----------|--|--|--|
| <b>2 = Skin</b>        |  |  | 4 =<br>Dryness |  |  | 3                        | 2  | 0.44 | 2                                   | 10 | 2.21 | 5 = Other |  |  |  |
| <b>3 = Respiratory</b> |  |  |                |  |  | 3, 4                     | 4  | 0.88 | 2, 3, 4, 5                          | 1  | 0.22 |           |  |  |  |
| <b>4 = Digestive</b>   |  |  |                |  |  | 4                        | 7  | 1.55 | 2, 3, 5                             | 3  | 0.66 |           |  |  |  |
|                        |  |  |                |  |  | Total                    | 45 | 100  | 2, 5                                | 6  | 1.33 |           |  |  |  |
|                        |  |  |                |  |  |                          |    |      | 2, 5, 6                             | 1  | 0.22 |           |  |  |  |
|                        |  |  |                |  |  | Note:                    |    |      | 3, 5                                | 1  | 0.22 |           |  |  |  |
|                        |  |  |                |  |  | 1 =<br>Redness           |    |      | 5                                   | 10 | 2.21 |           |  |  |  |
|                        |  |  |                |  |  | 2 = Burning<br>sensation |    |      | 5, 6                                | 1  | 0.22 |           |  |  |  |
|                        |  |  |                |  |  | 3 =<br>Itching           |    |      | Total                               | 45 | 100  |           |  |  |  |
|                        |  |  |                |  |  | 4 =<br>Dryness           |    |      |                                     | 2  |      |           |  |  |  |
|                        |  |  |                |  |  |                          |    |      | Note:                               |    |      |           |  |  |  |
|                        |  |  |                |  |  |                          |    |      | 1 = Cough                           |    |      |           |  |  |  |
|                        |  |  |                |  |  |                          |    |      | 2 = Shortness of<br>breath          |    |      |           |  |  |  |
|                        |  |  |                |  |  |                          |    |      | 3 = Nasal discharge                 |    |      |           |  |  |  |
|                        |  |  |                |  |  |                          |    |      | 4 = Hoarseness or scratch<br>throat |    |      |           |  |  |  |
|                        |  |  |                |  |  |                          |    |      | 5 = Nasal burning<br>sensation      |    |      |           |  |  |  |
|                        |  |  |                |  |  |                          |    |      | 6 = Other                           |    |      |           |  |  |  |

| Supplement for Figure 4. Information of multiple responses |       |         |       |                            |
|------------------------------------------------------------|-------|---------|-------|----------------------------|
|                                                            |       |         |       |                            |
|                                                            |       |         |       |                            |
|                                                            |       |         |       |                            |
| <b>Personal protective equipment</b>                       | Freq. | Percent | Cum.  | . tab q13_1 ;              |
| <b>0</b>                                                   | 147   | 40.27   | 40.27 | q13_1   Freq. Percent Cum. |
| <b>1</b>                                                   | 21    | 5.75    | 46.03 | -----+-----                |
| <b>1, 2</b>                                                | 20    | 5.48    | 51.51 | 0   189 61.97 61.97        |
| <b>1, 2, 3</b>                                             | 7     | 1.92    | 53.42 | 1   116 38.03 100.00       |
| <b>1, 2, 3, 4</b>                                          | 1     | 0.27    | 53.7  | -----+-----                |
| <b>1, 2, 3, 5</b>                                          | 2     | 0.55    | 54.25 | Total   305 100.00         |
| <b>1, 2, 4</b>                                             | 5     | 1.37    | 55.62 |                            |
| <b>1, 2, 5</b>                                             | 2     | 0.55    | 56.16 | . tab q13_2 ;              |
| <b>1, 3</b>                                                | 44    | 12.05   | 68.22 |                            |
| <b>1, 3, 4</b>                                             | 1     | 0.27    | 68.49 | q13_2   Freq. Percent Cum. |
| <b>1, 3, 5</b>                                             | 4     | 1.1     | 69.59 | -----+-----                |
| <b>1, 3, 5, 0</b>                                          | 1     | 0.27    | 69.86 | 0   220 72.13 72.13        |
| <b>1, 4</b>                                                | 4     | 1.1     | 70.96 | 1   85 27.87 100.00        |
| <b>1, 5</b>                                                | 4     | 1.1     | 72.05 | -----+-----                |
| <b>2</b>                                                   | 24    | 6.58    | 78.63 | Total   305 100.00         |
| <b>2, 0</b>                                                | 3     | 0.82    | 79.45 |                            |
| <b>2, 3</b>                                                | 13    | 3.56    | 83.01 | . tab q13_3 ;              |
| <b>2, 3, 4</b>                                             | 1     | 0.27    | 83.29 |                            |
| <b>2, 3, 5</b>                                             | 3     | 0.82    | 84.11 | q13_3   Freq. Percent Cum. |
| <b>2, 5</b>                                                | 4     | 1.1     | 85.21 | -----+-----                |
| <b>3</b>                                                   | 38    | 10.41   | 95.62 | 0   177 58.03 58.03        |
| <b>3, 0</b>                                                | 3     | 0.82    | 96.44 | 1   128 41.97 100.00       |
| <b>3, 5</b>                                                | 10    | 2.74    | 99.18 | -----+-----                |
| <b>4</b>                                                   | 1     | 0.27    | 99.45 | Total   305 100.00         |

|                              |     |      |     |  |               |       |         |        |  |
|------------------------------|-----|------|-----|--|---------------|-------|---------|--------|--|
| <b>5</b>                     | 2   | 0.55 | 100 |  |               |       |         |        |  |
| <b>Total</b>                 | 365 | 100  |     |  | . tab q13_4 ; |       |         |        |  |
| <b>Note:</b>                 |     |      |     |  | q13_4         | Freq. | Percent | Cum.   |  |
| <b>1 = Face mask</b>         |     |      |     |  | -----+-----   |       |         |        |  |
| <b>2 = Rubber gloves</b>     |     |      |     |  | 0             | 292   | 95.74   | 95.74  |  |
| <b>3 = Disposable gloves</b> |     |      |     |  | 1             | 13    | 4.26    | 100.00 |  |
| <b>4 = Face shield</b>       |     |      |     |  | -----+-----   |       |         |        |  |
| <b>5 = Other PPE</b>         |     |      |     |  | Total         | 305   | 100.00  |        |  |
|                              |     |      |     |  |               |       |         |        |  |
|                              |     |      |     |  | . tab q13_5 ; |       |         |        |  |
|                              |     |      |     |  |               |       |         |        |  |
|                              |     |      |     |  | q13_5         | Freq. | Percent | Cum.   |  |
|                              |     |      |     |  | -----+-----   |       |         |        |  |
|                              |     |      |     |  | 0             | 273   | 89.51   | 89.51  |  |
|                              |     |      |     |  | 1             | 32    | 10.49   | 100.00 |  |
|                              |     |      |     |  | -----+-----   |       |         |        |  |
|                              |     |      |     |  | Total         | 305   | 100.00  |        |  |

## The Survey Question in English

1. Since the beginning of the lockdown for the Coronavirus, what was the main source you depended on to get information about disinfection practice to protect the members of your households from the COVID-19?
2. What is the main reason for choosing this source to depend on to get information about disinfection practice to protect the members of your households from the COVID-19?
3. Since the start of lockdown for the Coronavirus, did you use any of the following resources at least once to get information about the disinfection practice to protect the members of your households from the COVID-19?
4. Since the start of lockdown for the Coronavirus, did you clean your household more frequently?
5. Since the start of lockdown for the Coronavirus, did you use cleaning products and disinfectants more frequently?
6. Since the start of lockdown for the Coronavirus, what are the products did you use for cleaning and disinfecting your household?
7. If you used bleach for disinfection during the lockdown, how many times did you use it per day?
8. If you used bleach for disinfection during the lockdown, did you mix it with any other products?
9. If you used bleach for disinfection during the lockdown, what products did you use to mix with bleach (other than water)?
10. How did you use the cleaning products and disinfectants in your household during the lockdown? You can choose all what applies for you?
11. Did you use any personal protective equipment for these chemical products while disinfecting your household during the lockdown for Corona virus?
12. Please select which PPE did you use while disinfecting your household during the lockdown for Corona virus?
13. If you used bleach for disinfection during the lockdown, did you or any other family member in your household experienced any adverse effects to bleach?
14. Please mention the number of persons experienced adverse effects to bleach during the lockdown for the Coronavirus.
15. Please mention the age of person(s) experienced adverse effects to bleach during the lockdown for the Coronavirus.
16. If you used bleach for disinfection during the lockdown, and you or any other family member in your household experienced any adverse effects to bleach, what are these adverse effects?
17. If you used bleach for disinfection during the lockdown, and you or any other family member in your household experienced adverse effects to bleach in the eyes, what are these adverse effects?
18. When you or any other family member in your household experienced adverse effects to bleach in the eyes, how did you seek help? Please select the first option did you use to ask for help.
19. If you used bleach for disinfection during the lockdown, and you or any other family member in your household experienced adverse effects to bleach in the skin, what are these adverse effects?
20. When you or any other family member in your household experienced adverse effects to bleach in the skin, how did you seek help? Please select the first option did you use to ask for help.
21. If you used bleach for disinfection during the lockdown, and you or any other family member in your household experienced adverse effects to bleach in the respiratory system, what are these adverse effects?

- 
22. When you or any other family member in your household experienced adverse effects to bleach in the respiratory system, how did you seek help?  
Please select the first option did you use to ask for help.
- 
23. If you used bleach for disinfection during the lockdown, and you or any other family member in your household experienced adverse effects to bleach in the digestive system, what are these adverse effects?
- 
24. When you or any other family member in your household experienced adverse effects to bleach in the digestive system, how did you seek help?  
Please select the first option did you use to ask for help.
- 
25. If you used bleach for disinfection during the lockdown, and you or any other family member in your household experienced any adverse effects to bleach, did you need to go to a hospital or a clinic?
- 
26. Did you feel safe while visiting a hospital or a clinic to seek help due to the experience of you or any other family member of adverse effects as a result of using bleach for disinfection during the lockdown?
- 
27. Did you use PPE while going or visiting a hospital or a clinic to seek help due to the experience of you or any other family member of adverse effects as a result of using bleach for disinfection during the lockdown?
- 
28. Please select the PPE you used while going or visiting a hospital or a clinic to seek help due to the experience of you or any other family member of adverse effects as a result of using bleach for disinfection during the lockdown?
- 
29. When you go to the hospital or the clinic to ask for help due to the experience of adverse effects as a result of using bleach for disinfection during the lockdown, did you feel that you received the proper treatment?
- 
30. After receiving you or other family members the proper treatment in the hospital or the clinic, did the adverse effects disappear?
- 
31. After receiving you or other family members the proper treatment, was you admitted to the hospital?
- 
32. Did you need or any other family member to communicate with a poison center to solve your problem?
- 
33. The age group for the person who filled the questionnaire?
- 
34. The gender of the person who filled the questionnaire?
- 
35. The city where the person who filled the questionnaire lives?
- 
36. The country where the person who filled the questionnaire lives?
- 
37. The highest degree the person who filled the questionnaire earned?
- 
38. The occupation of the person who filled the questionnaire.
- 
39. The number of family members of the household of the person who filled the questionnaire.
- 
40. The number of children (18 years or less) of the household of the person who filled the questionnaire.
- 
41. The number elderlies (60 years or more) of the household of the person who filled the questionnaire.
-
